# Supplementary material
Source: PubMed Central journal article supplement (PMC3371242)
Supplement: supp_M025320_jlr.M025320-4.pdf [file supp_M025320_jlr.M025320-4.pdf]

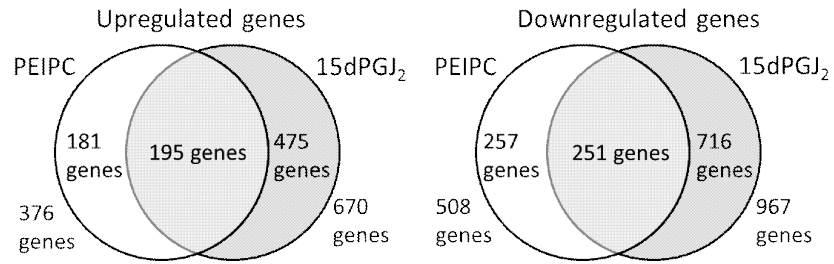

Figure S1: Venn diagram of overlap in PEIPC and 15dPGJ<sub>2</sub>-regulated genes in HAECs using genes up- or down-regulated by at least 1.5 fold vs. control-treated cells
